# Supplementary material for: Mutually opposing activity of PIN7 splicing isoforms is required for auxin-mediated tropic responses in Arabidopsis thaliana
Source: bioRxiv or medRxiv preprint supplement (doi:10.1101/2020.05.02.074070), 2021-03-02
Supplement: Supplementary file [file media-1.pdf]

**A**

| Part                 | <i>PIN4a</i> | <i>PIN4b</i> | <i>PIN4c</i> | <i>PIN4a</i> | <i>PIN4b</i> | <i>PIN4c</i> | References               |
|----------------------|--------------|--------------|--------------|--------------|--------------|--------------|--------------------------|
| Aerial               | 299          | 314          | 27           | 49.14%       | 46.64%       | 4.22%        | (Cheng et al., 2017)     |
| Dark grown seedling  | 437          | 333          | 28           | 54.76%       | 41.73%       | 3.51%        | (Cheng et al., 2017)     |
| Leaf                 | 1274         | 1197         | 79           | 49.96%       | 46.94%       | 3.10%        | (Cheng et al., 2017)     |
| Light grown seedling | 1463         | 1341         | 52           | 51.23%       | 46.95%       | 1.82%        | (Cheng et al., 2017)     |
| Root                 | 101          | 50           | 4            | 65.16%       | 32.26%       | 2.58%        | (Cheng et al., 2017)     |
| Root tip             | 167          | 120          | 6            | 57.00%       | 40.95%       | 2.05%        | (Ruzicka et al., 2017)   |
| Root apical meristem | 51           | 53           | 19           | 41.46%       | 43.49%       | 15.45%       | (Cheng et al., 2017)     |
| Seedling hypocotyl   | 41           | 30           | 6            | 53.54%       | 31.15%       | 7.79%        | (Klepikova et al., 2016) |

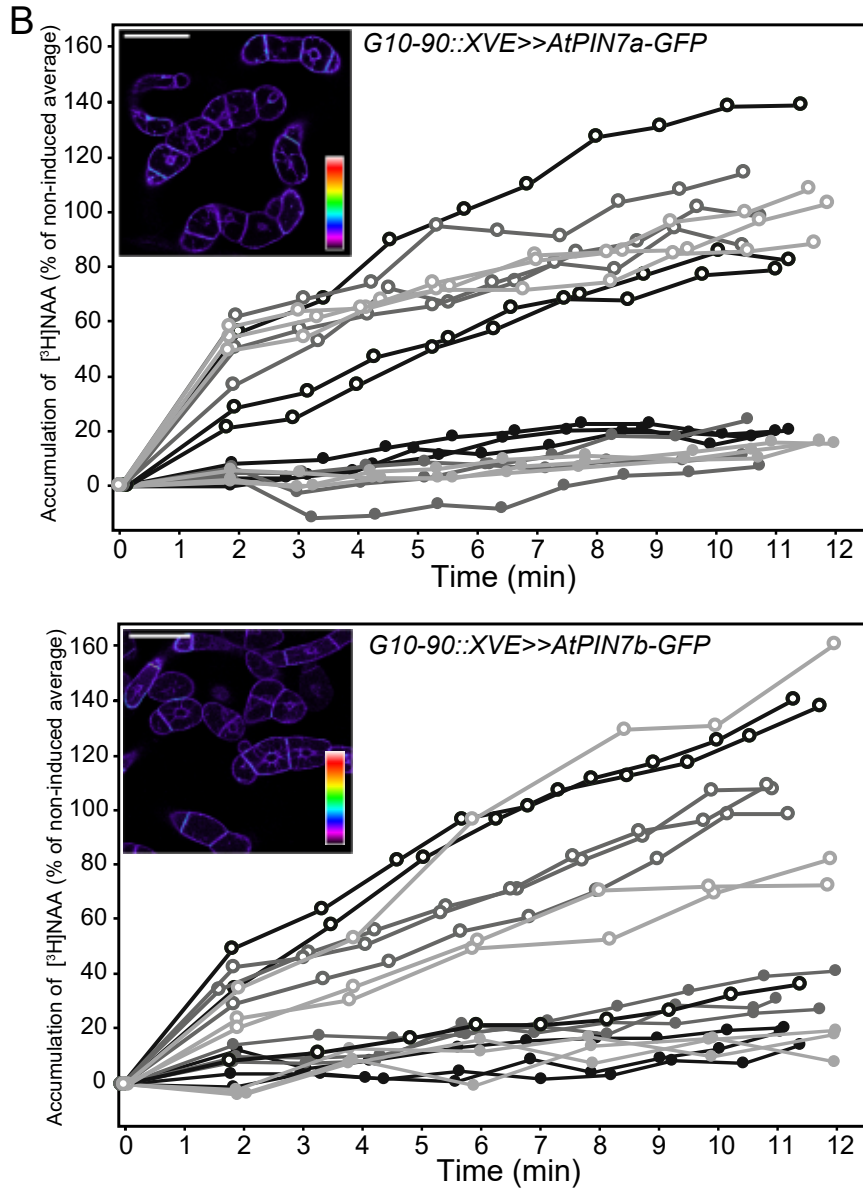

**Supplemental Figure 1. Determination of the relative presence of PIN4 transcripts in selected tissues and organs and  $[^3\text{H}]\text{NAA}$  accumulation kinetics of PIN7a and PIN7b. Related to Figure 1.**

(A) Quantification of the RNA-seq reads spanning the exon1-exon2 junction corresponding to the detected PIN4 transcripts in selected *Arabidopsis thaliana* tissue sources, their ratio was calculated as a percentage total reads mapped to this area, as assessed from the genome browser graphic interface.

(B)  $[^3\text{H}]\text{NAA}$  accumulation kinetics in tobacco BY-2 cells following 2-day induction of either G10-90::XVE>>AtPIN7a-GFP (upper plot) or G10-90::XVE>>AtPIN7b-GFP (lower plot) constructs with 1  $\mu\text{M}$   $\beta$ -estradiol. Inset: representative images of GFP fluorescence of the respective protein on the plasma membrane in the  $\beta$ -estradiol treated cells. Obtained values were normalized to the average maximum  $[^3\text{H}]\text{NAA}$  accumulation rates in the non-induced lines. Closed symbols:  $\beta$ -estradiol-induced lines, open symbols: solvent control. Different shades of gray denote corresponding biological replicates done at the same time for PIN7a, PIN7b and their respective non-induced controls. Bars, 50  $\mu\text{m}$ .
