# Supplementary material for: Mutually opposing activity of PIN7 splicing isoforms is required for auxin-mediated tropic responses in Arabidopsis thaliana
Source: bioRxiv or medRxiv preprint supplement (doi:10.1101/2020.05.02.074070), 2021-03-02
Supplement: Supplementary file [file media-2.pdf]

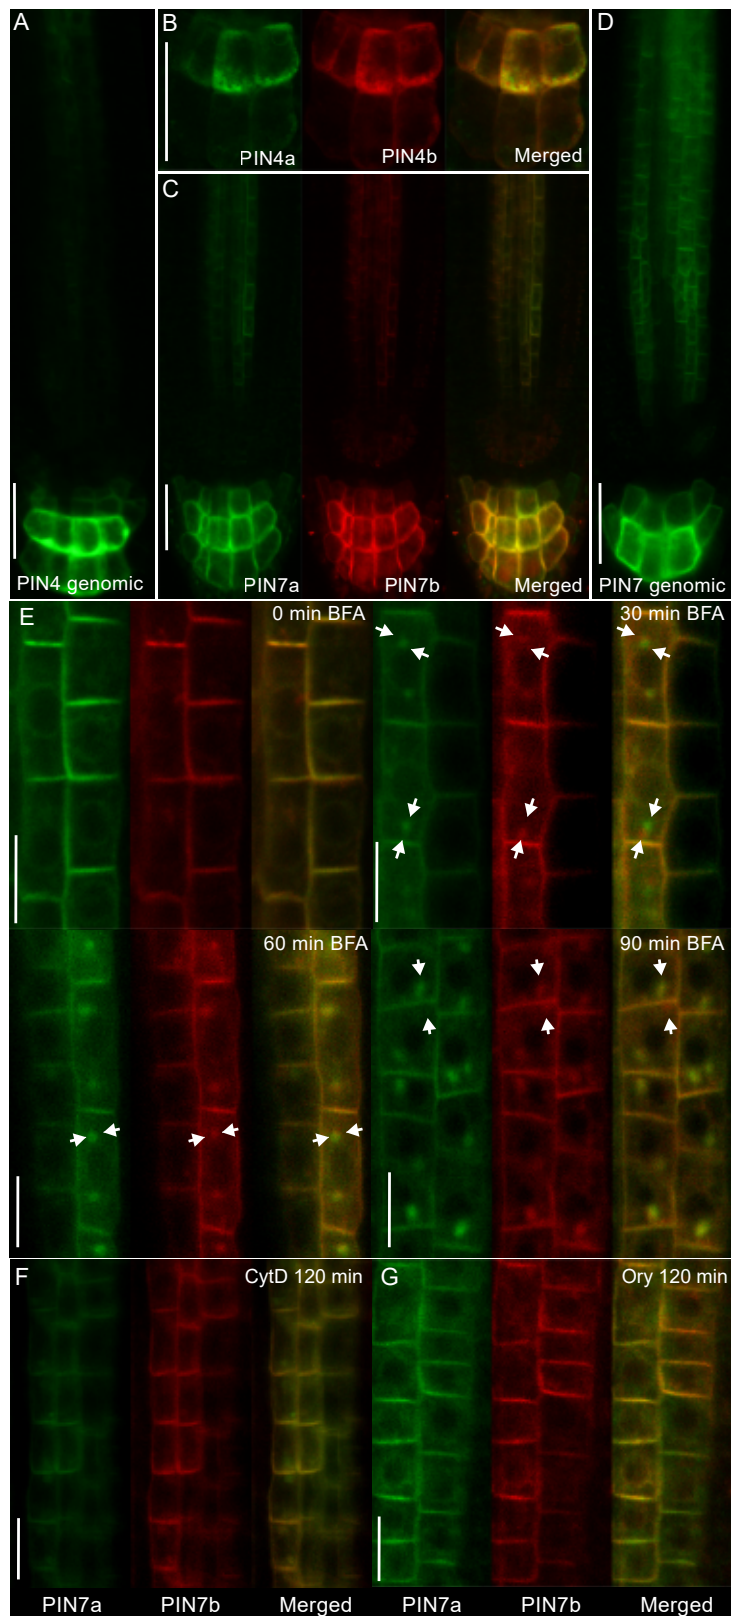

**Supplemental Figure 2. Localization and expression patterns of PIN4 and PIN7 splice isoforms expressed under the control of their native promoters and their differential response to drugs interfering with the PIN subcellular dynamics. Related to Figure 2.**

(A and B) The expression and localization pattern of the genomic PIN4::PIN4-GFP construct (A) compared with that of PIN4::PIN4a-GFP and PIN4::PIN4b-RFP cDNAs (B) in the primary root tip cells.

(C and D) Root tip expression and localization pattern of the PIN7::PIN7a-GFP and PIN7::PIN7b-RFP cDNAs (C) compared to the genomic PIN7::PIN7-GFP construct (D).

(E) Time-lapse imaging of the effect of 50  $\mu$ M brefeldin A (BFA) on PIN7a-GFP and PIN7b-RFP. Arrows mark the incomplete co-localization of PIN7a and PIN7b in BFA bodies.

(F and G) Absence of obvious effects on the PIN7a-GFP and PIN7b-RFP localization after 2 h treatments with the 20  $\mu$ M actin polymerization inhibitor cytochalasin D (F) and with the 20  $\mu$ M microtubule depolymerization drug oryzalin (G).

Bars: 25  $\mu$ m (A-D), 10  $\mu$ m (E-G).
