# Supplementary material for: Mutually opposing activity of PIN7 splicing isoforms is required for auxin-mediated tropic responses in Arabidopsis thaliana
Source: bioRxiv or medRxiv preprint supplement (doi:10.1101/2020.05.02.074070), 2021-03-02
Supplement: Supplementary file [file media-4.pdf]

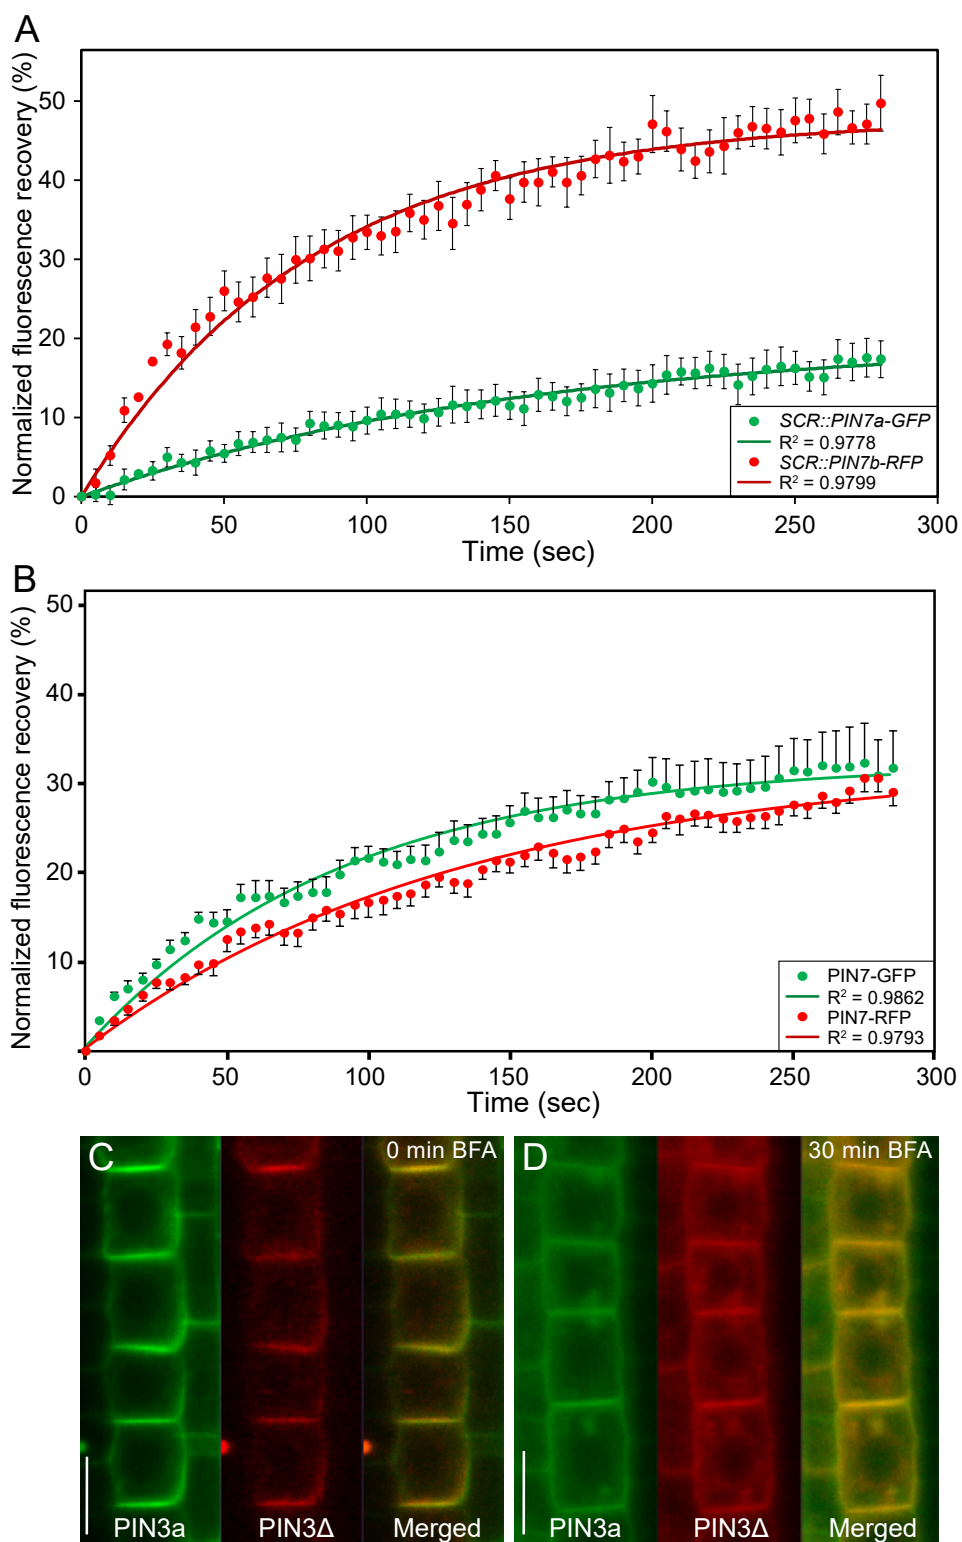

**Supplemental Figure 4. Additional FRAP analysis of PIN7 isoforms on the plasma membrane and intracellular localization of PIN3::PIN3Δ-RFP cDNA compared to the PIN3::PIN3-GFP construct. Related to Figure 3.**

(A) The SCR::PIN7a-GFP and SCR::PIN7b-RFP normalized FRAP, with single-phase exponential fitting curves. PIN7b-RFP shows different recovery on the plasma membrane, compared with the PIN7a-GFP.

(B) Similar FRAP of the genomic construct PIN7-GFP and PIN7-RFP signal on the plasma membrane with single-phase exponential fitting curves.

(C and D) Comparison of subcellular localization (C) and response to BFA (D) of the PIN3Δ-RFP protein (designed to mimic the PIN7b isoform), with the control PIN3-GFP. Bars, 10 μm.

On (A and B), data are means ± S. E. At least 3 membranes in 5-6 root tips were analyzed in each experiment (n ≥ 20).
