# Supplementary material for: Mutually opposing activity of PIN7 splicing isoforms is required for auxin-mediated tropic responses in Arabidopsis thaliana
Source: bioRxiv or medRxiv preprint supplement (doi:10.1101/2020.05.02.074070), 2021-03-02
Supplement: Supplementary file [file media-7.pdf]

Name            Sequence

BP cloning of natural promoters

- 1 Pr3\_gWF      ggggacaagttgtacaaaaagcaggcttatacagcaacactaagtcacaagaaggt
- 2 Pr3\_gWR      ggggacaactttgtatacaaaagttgtcttgaaggacaaaaatggaaaaccg
- 3 Pr4\_gWF      ggggacaagttgtacaaaaagcaggcttatcttctttttgttggtatgtccaaactg
- 4 Pr4\_gWR      ggggacaactttgtatacaaaagttgtttttccgggtgggttttgagtt
- 5 Pr7\_gWF      ggggacaagttgtacaaaaagcaggcttactataatttttgtatcggccaatattgatatttaaccgat
- 6 Pr7\_gWR      ggggacaactttgtatacaaaagttgtattgttctcggcgagtg

BP cloning of cDNA constructs

- 7 P3\_gWF      ggggacaactttgtatacaaaagttgtaatgatctcatggcacgacctctacacgggtcc
- 8 P3\_gWR      ggggaccactttgtacaagaagctgggtttataaccgag
- 9 P4\_gWF      ggggacaactttgtatacaaaagttgtaatgattacgtggcacgactgtac
- 10 P4\_gWR      ggggaccactttgtacaagaagctgggtttcaaaggccaagaagaatatagtagaccag
- 11 P7\_gWF      ggggacaactttgtatacaaaagttgtaatgatcacatggcacgacctct
- 12 P7\_gWR      ggggaccactttgtacaagaagctgggtttatagcccagtaaaatgtagtaaacaaagt

BP cloning of ScR promoters

- 13 prScR\_gW\_F ggggacaagttgtacaaaaagcaggcttaaatgttgaatccattctcaagctttgcc
- 14 prScR\_gW\_F ggggacaactttgtatacaaaagttgtggagattgaagggttgggtc

Primers for inverse PCR of cDNAs

- 15 P4\_inv\_F    aaatctagagcatatgcccccacaagt
- 16 P4\_inv\_R    aaacccgggtgtccgttggccgcc
- 17 P7\_inv\_F    aaatctagagcatatgccaccagcgagt
- 18 P7\_inv\_R    aaacctggctttaccggtacagtttc

RFP and GFP primers

- 19 RFP\_F      aaacctggatggcctcctcc
- 20 RFP\_R      aaatctagatgagtggcggcc
- 21 gFP\_F      aaacctgggtaaggagaag
- 22 gFP\_R      aaatctagaggatccatgatg

AS reporter cloning

- 23 P7shift\_2F gatcatctcaaaatggtgaaaaacaagg
- 24 P7shift\_2R cctttgttttcaccattttgagatgatc
- 25 P7\_mutF    gatctctgatcactcaaaatggttaaaacaaggttttaac
- 26 P7\_mutR    gttaaaaacctttgtttaaccattttgagatgatcagagatc

Cloning into pMDC7 inducible system

- 27 PIN4.1codF ggggacaagttgtacaaaaagcaggctctatgattacgtggcacgactgtacaccgtcctcaccgccgtgt
- 28 PIN4.1codR ggggaccactttgtacaagaagctgggttaaggccaagaagaatatagtagac
- 29 PIN7.1codF ggggacaagttgtacaaaaagcaggctctatgatcacatggcacgacctctacaccgtcctcaccggcggtgat
- 30 PIN7.1codR ggggaccactttgtacaagaagctgggtttagcccagtaaaatgtagtaaac
